# Supplementary material for: Hydrogen-bonding-enhanced green wearable sensors with high generation performance and low Young's modulus
Source: Royal Society of Chemistry journal article supplement (doi:10.1039/d4ta06919f), 2024-12-04
Supplement: d4ta06919f1.pdf [file d4ta06919f1.pdf]

1 **Supporting Information:**

2 **Hydrogen-bonding-enhanced green wearable sensors with**  
3 **high generation performance and low Young's modulus**

4 Caixia Gao, Wangshu Tong\*, Runfeng Yu, Songling Liu, Yihe Zhang\*

5 Engineering Research Center of Ministry of Education for Geological Carbon Storage and Low  
6 Carbon Utilization of Resources, Beijing Key Laboratory of Materials Utilization of Nonmetallic  
7 Minerals and Solid Wastes, National Laboratory of Mineral Materials, School of Materials Science  
8 and Technology, China University of Geosciences (Beijing), 100083, China

9 **1. Experimental methods**

10 **1.1 Materials**

11 CS (deacetylated  $\geq 95\%$ ), glycerin (AR, 99%), diatomite (MW 60.08) and acetic  
12 acid (AR, 99.5%) were procured from Macklin. Deionized water, aluminum foil,  
13 double-faced adhesive tape, FEP (thickness 0.15 mm), and magnesium (Mg) foil  
14 (thickness 0.05 mm) were obtained from a native shop.

15 **1.2 Preparation of the CS-glycerin-diatomite composite film**

16 CS-glycerin-diatomite composite films were fabricated by casting method. The  
17 CS solution was obtained by adding 0.3 g of CS powder to 10 ml of acetic acid solution  
18 (2% v/v). Subsequently, the solution was stirred continuously in an oil bath at 30 °C for  
19 6 h to obtain a viscous, yellowish transparent CS solution. Then, different contents of  
20 glycerin solution and diatomite were added to the CS solution and stirred continuously  
21 for 3 hours in an oil bath at 30 °C to obtain a CS-glycerin-diatomite mixture, the  
22 solution was then left to degas for 5 h until no air bubbles were present. The  
23 homogeneous CS-glycerin-diatomite solution obtained was added dropwise to a petri  
24 dish and then dried at 60 °C for 4 hours to obtain the CS-glycerin-diatomite composite  
25 film.

26 **1.3 Fabrication of CS-glycerin-diatomite/FEP based TENG**

27 The CS-glycerin-diatomite/FEP-based TENG comprising CS-glycerin-diatomite  
28 composite film and FEP film was designed to realize a vertical contact-separation mode

1 TENG. The CS-glycerin-diatomite composite film served as a positive friction layer,  
2 while the FEP film served as a negative friction layer. The Mg foil acted as an electrode.  
3 The total area of the films was  $1.5 \times 1.5$  cm.

#### 4 **1.4 Measurement and characterization**

5 The morphology and structure of CS-glycerin-diatomite composite film was  
6 characterized using field emission SEM (Zeiss Gemini 300 scanning electron  
7 microscope). A Fourier-transform infrared (FTIR) spectrometer (Frontier, Perkin  
8 Elmer, USA) was used to measure the infrared absorption spectra of samples and  
9 analyze its characteristics. The output performance of the CS-glycerin-diatomite  
10 composite film/FEP TENG was tested using a galvanometer (Keithley Model 6517B).  
11 A closed-loop linear motor system was used to apply force and a pressure control  
12 system was used to implement the contact and separation process. The stress-strain  
13 curves were measured on a universal testing machine (Chengde Sheng Testing  
14 Equipment Co., Ltd China). By fitting the stress-strain curve linearly, the Young's  
15 modulus of CS-glycerol-diatomite was determined (The Young's modulus was  
16 calculated by taking the first 5% of the stress-strain curve)<sup>1-5</sup>. The values of Young's  
17 modulus were all calculated at a stress-strain measurement rate of 50 mm/min (The  
18 dimensions of the CS-glycerol-diatomite film were 20 mm in length and 10 mm in  
19 width, and the thickness of the film was 0.24 mm), and three tests were performed and  
20 averaged. A strain of *Escherichia coli* (*E. coli*) was cultured overnight in Luria-Bertani  
21 medium, and 10  $\mu$ L was spread on the plate. The strain was grown for 16 h at 37°C in  
22 an incubator. The test film (CS-glycerin-diatomite composite film) was cut into circles  
23 and placed on the plates. After 24 h of incubation at 37 °C, size of clear zone that might  
24 appear on the plate was checked, and the incubation of the microbial species was  
25 recorded.

#### 26 **1.5 Vitro biodegradable test of the CS-glycerin-diatomite composite film**

27 The dimensions of CS-glycerin-diatomite composite film were fixed at  $1 \times 1$  cm.  
28 The CS-glycerin-diatomite composite film was placed in outdoor soil and photographed  
29 at various times to observe their degradation process until complete degradation.

30

## 2. EDS data for chitosan films and chitosan-glycerin-diatomite

### 2 composite films

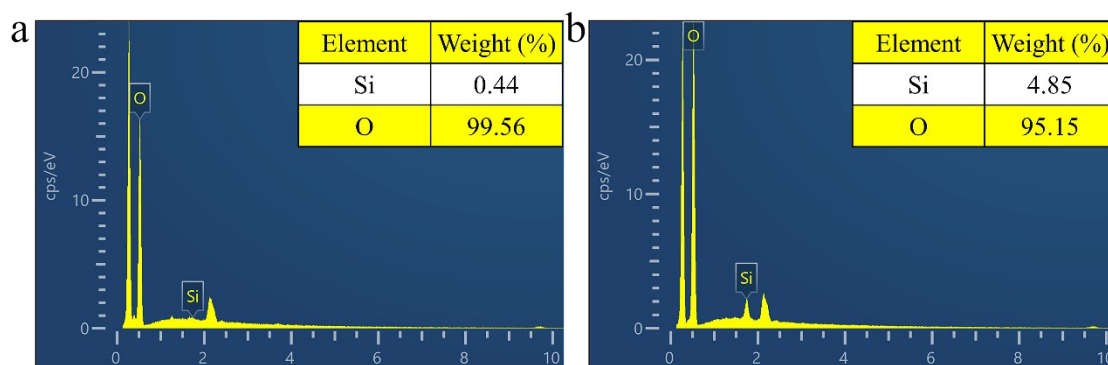

Figure S1 (a) EDS data for chitosan films. (b) EDS data for chitosan-glycerin-diatomite composite films.

### 3. The Young's modulus

The Young's modulus of the CS film is 13.706 KPa and that of the CS-glycerol-diatomite film is 0.3191 KPa. The values of Young's modulus were all calculated at a stress-strain measurement rate of 50 mm/min, three tests were conducted and averaged with a standard deviation of 0.03. The CS-glycerol-diatomite composite film has a lower Young's modulus due to the addition of glycerol and diatomite, which introduces more hydroxyl groups to disrupt the internal interactions of the CS resulting in greater deformation in friction process. On the contrary, the CS film has tightly connected internal molecules, leading to the high value of Young's modulus, which is difficult to deform.

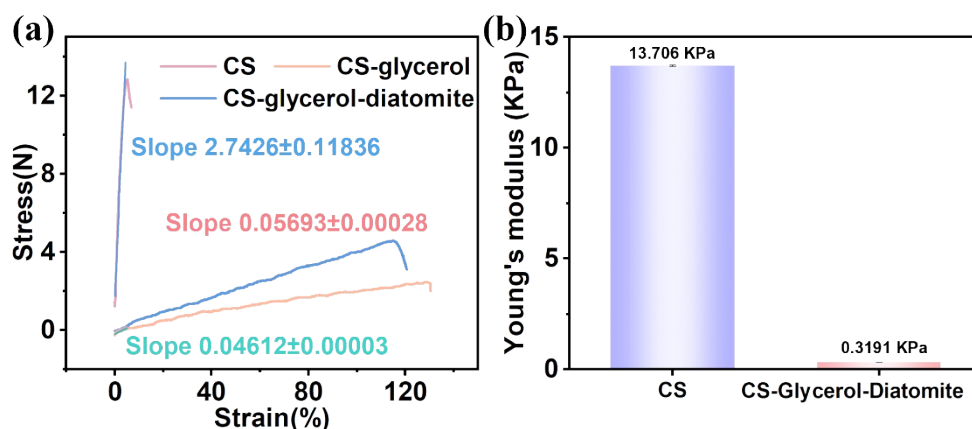

1 Figure S2 (a) Young's modulus of CS, CS-glycerol films and CS-glycerol-diatomite  
2 films, (b) Young's modulus error bars for CS and CS-glycerol-diatomite films.

### 3 **4. Characterization of air permeability**

4 The demonstration of the high air permeability of the composite film was done by  
5 comparing the water vapor transmission rate (WVTR) of the CS film and the composite  
6 film. Specific experiments were conducted by sealing the CS film and the composite  
7 film onto the top of a glass bottle containing distilled water, weighing the overall weight  
8 every 1 hour, and characterizing the WVTR by the difference in the overall weight. The  
9 characterization results are shown in Fig. S3, where the WVTR of the CS-glycerol-  
10 diatomite film is 1.6 times higher than that of the pure CS film, which suggests that the  
11 incorporation of glycerol and diatomite enhances the air permeability of the film.

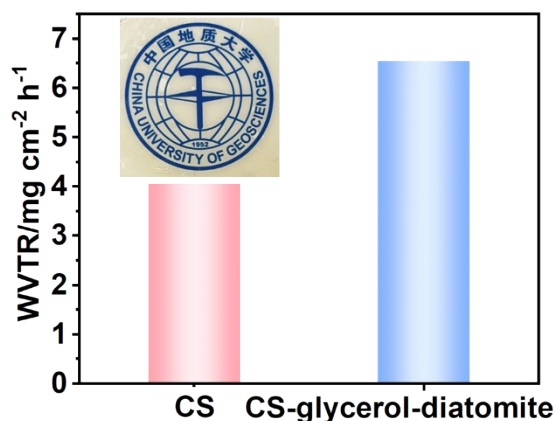

12  
13 Figure S3 WVTR of CS film and CS-glycerol-diatomite film. The inset is an optical  
14 picture of CS-glycerol-diatomite film.

### 15 **5. Working Mechanism**

16 The mechanism of TENG was explained by the couple of contact electrification  
17 and electrostatic induction effects. Based on two friction materials' electron capture  
18 capabilities, the CS-glycerol-diatomite template composite film is positively charged,  
19 and FEP film is negatively charged with an equivalent charge magnitude (stage I).  
20 During the release from the counter film, the electric potential difference increases,  
21 resulting in electron transfer from the FEP film electrode to the CS-glycerol-diatomite  
22 composite film electrode (stage II). Electrons finished transferring after two dielectric  
23 films fully separated (stage III). In the contact process, the electrons moved from the

1 CS–glycerol-diatomite template composite film electrode to the FEP film electrode  
2 (stage IV). When the FEP film completely contacted with the CS–glycerol-diatomite  
3 template composite film, both electrodes change to the neutral charge state (stage I).  
4 The CS–glycerol-diatomite template composite film/FEP–based TENG can generate  
5 an electric current through this periodic process.

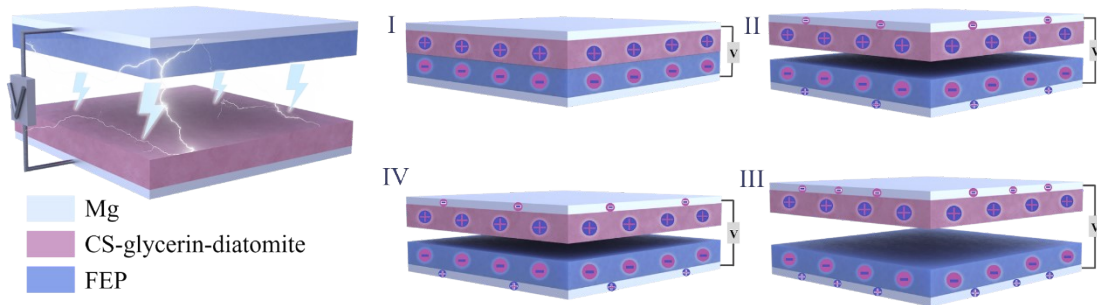

7 Figure S4 The operating principle of the contact separation mode TENG.

8

## 9 6. Electrical output performance

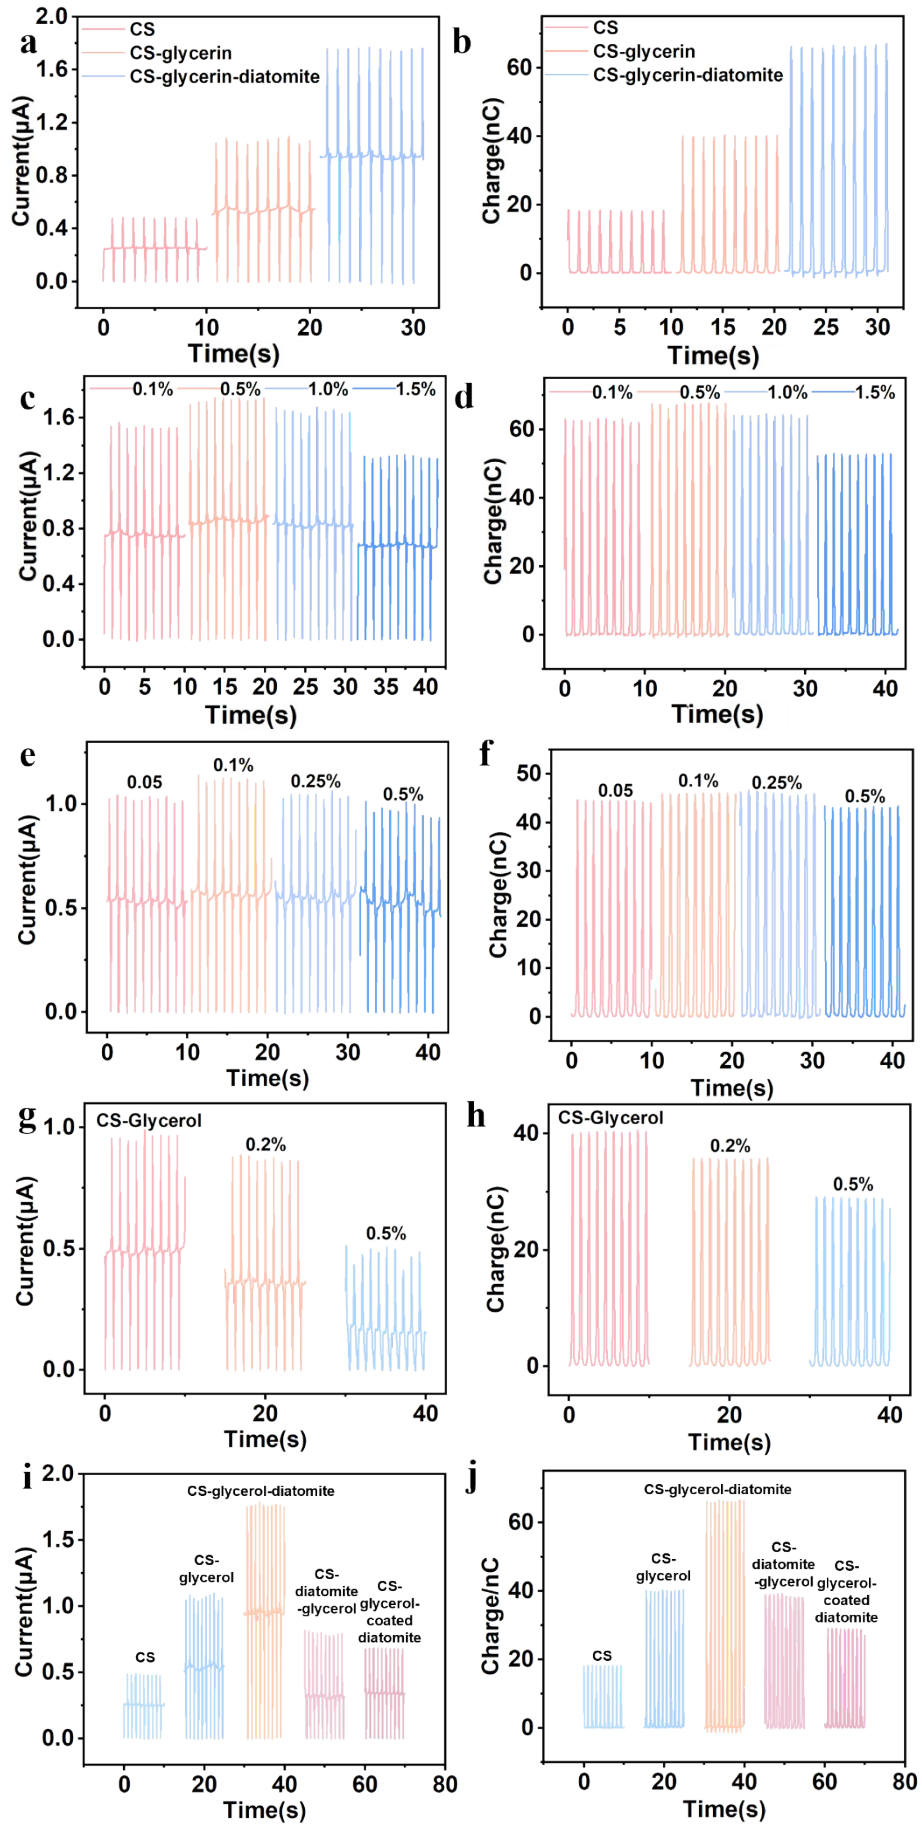

1 Figure S5 Electrical output performance test of CS–glycerol–diatomite composite film–  
 2 based TENG. (a) Short-circuit current at different diatomite contents. (b) Transferred  
 3 charge at different diatomite contents. (c) Short-circuit current of CS-glycerol–  
 4 diatomite composite film-based TENG. (d) Transferred charge of CS-glycerol–  
 5 diatomite composite film-based TENG. (e) Short circuit of CS-diatomite-glycerol  
 6 composite film-based TENG. (f) Transferred charge of CS-diatomite-glycerol  
 7 composite film-based TENG. (g) Short circuit current of CS-glycerol-coated diatomite  
 8 composite film-based TENG. (h) Transferred charge of CS-glycerol-coated diatomite  
 9 composite film-based TENG. (i) Comparison of short circuit currents of CS films, CS–  
 10 glycerol-diatomite films, CS-diatomite-glycerol films and CS-glycerol coated  
 11 diatomite films. (j) Comparison of transferred charges of CS films, CS-glycerol–  
 12 diatomite films, CS-diatomite-glycerol films and CS-glycerol coated diatomite films.  
 13

## 14 7. Short–circuit current and transfer of charge

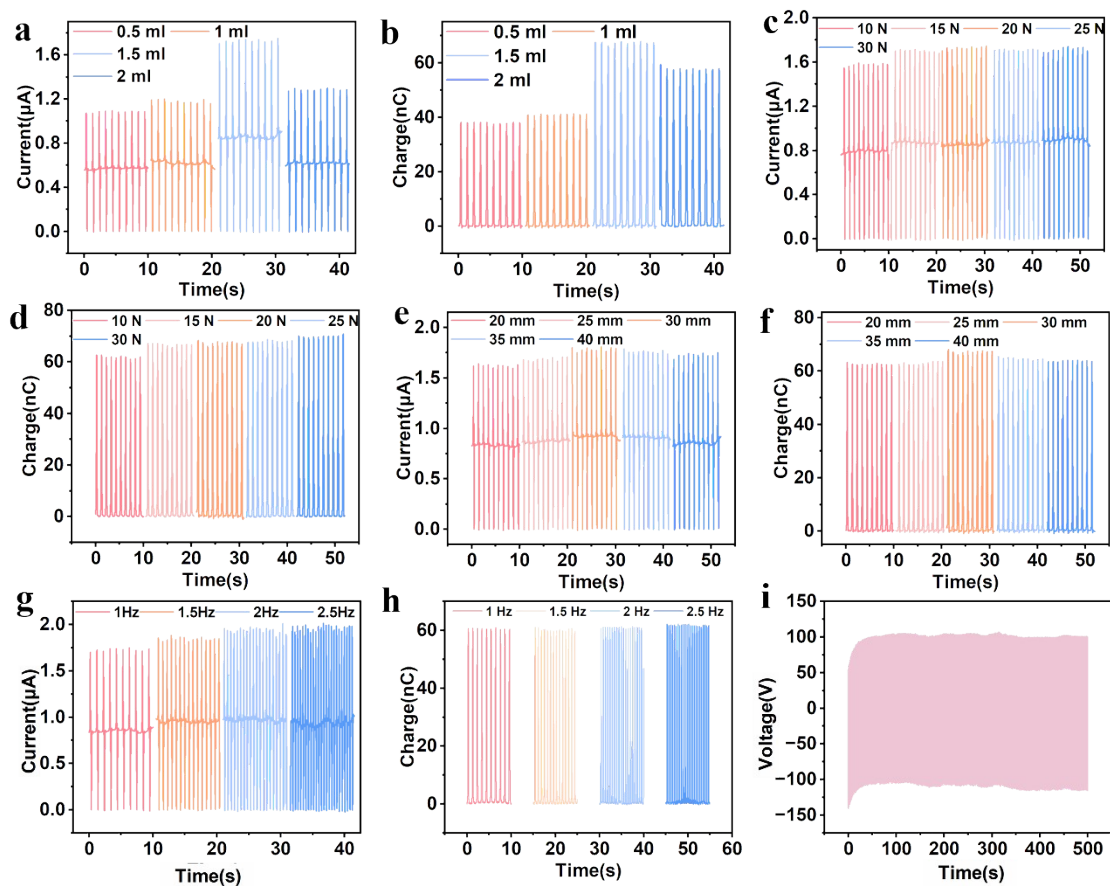

15

16 Figure S6 Electrical output performance test of CS–glycerol–diatomite composite film–

1 based TENG. (a) Short circuit current under different glycerol contents. (b) Transferred  
 2 charge under different glycerol contents. (c) Short circuit current under different  
 3 applied forces. (d) Transferred charge under different applied forces. (e) Short circuit  
 4 current at different separation distances. (f) Transferred charge at different separation  
 5 distances. (g) Short circuit current under different frequencies. (h) Transferred charge  
 6 under different frequencies. (i) Open circuit voltage during 0 seconds to 1000 seconds  
 7 cyclic.

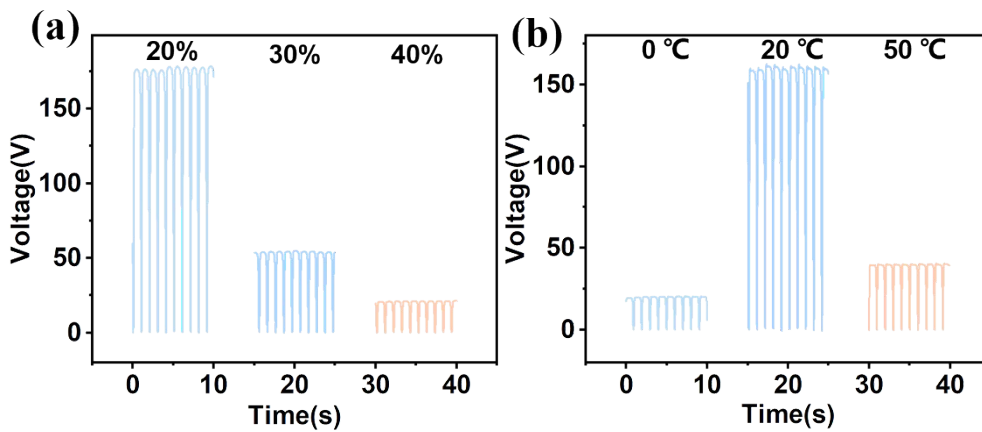

8  
 9 Figure S7 Output performance test of CS-glycerol-diatomite composite film-based  
 10 TENG at different temperatures and humidity. (a) Output performance test of CS-  
 11 glycerol-diatomite composite film-based TENG at different humidity. (b) Output  
 12 performance test of CS-glycerol-diatomite composite film-based TENG at different  
 13 temperatures.

14

## 15 8. COMSOL simulation

16 The modelling process assumes that the known physical quantities such as the electrical  
 17 properties of the material (for example dielectric constant, conductivity) and the friction  
 18 coefficient remain constant during the simulation. The physical quantities such as  
 19 electric and magnetic fields at the boundary are uniform. The size of the friction layer  
 20 is 20mm\*20mm\*5mm. The effect of temperature, humidity and other factors are not  
 21 considered in the simulation process.



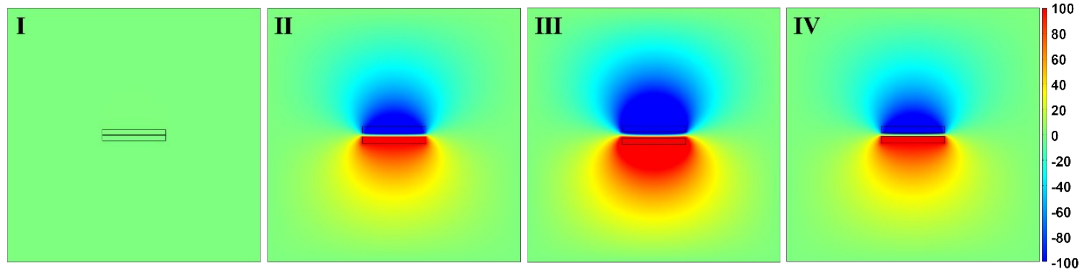

1

2 Figure S8 Theoretical model for the dielectric-to-dielectric contact-separation-mode

3 TENG. (I) complete contact between friction layers, (II) Gradual separation between

4 friction layers, (III) Complete separation between friction layers, (IV) Gradual contact

5 between friction layers.

6

## 7 9. Calculation formula

8 The power density of TENG was calculated as Equation (1)

$$9 \quad P = I^2 R / A \quad (1)$$

10 where I is the output current for the corresponding resistance R, and A is the effective

11 contact area.

Table S1 Detailed information such as the output performance of TENG composed of this material is compared with other materials in the field.

| Friction layer                                                                                           | Electrode           | Open-circuit voltage (V) | Short-circuit current ( $\mu\text{A}$ ) | transfer charge (nC) | power density ( $\mu\text{W cm}^{-2}$ ) | Durability (cycles) | Ways to improve output performance                                                         | Application                                                | Refs |
|----------------------------------------------------------------------------------------------------------|---------------------|--------------------------|-----------------------------------------|----------------------|-----------------------------------------|---------------------|--------------------------------------------------------------------------------------------|------------------------------------------------------------|------|
| Modified CFP coated with three layers of $\text{Ti}_{0.8}\text{O}_2$ NSs and five layers of Ag NPs, PDMS | Al                  | 42                       | 1                                       | -                    | 25                                      | 9300                | The addition of conductive fillers produces conductive paths and promotes charge transport | Drives small electronics, harvesting energy human activity | 6    |
| CNF/PEI aerogel, PVDF nanofiber                                                                          | Two aluminum strips | 26                       | 2.6                                     | -                    | $0.34 \text{ W m}^{-2}$                 | 10000               | Modifying CNF with PEI improves the power density                                          | Detect human motion                                        | 7    |
| Poly-ethyleneimine (PEI) paper, PTFE                                                                     | Cu                  | 68.6                     | 4.47                                    | 9.12                 | -                                       | 900                 | Introduction of PEI improves the positive polarity of the friction layer                   | Self-powered pressure sensor                               | 8    |
| Amino silane modification of a CNF film, FEP                                                             | Conductive adhesive | 155                      | 17.5                                    | -                    | $0.22 \text{ W m}^{-2}$                 | 10000               | The positive electric property was improved by amino silane modification                   | -                                                          | 9    |
| Allicin grafted CNFs (Alc-S-CNF), PVDF                                                                   | Al                  | 7.9                      | 5.13                                    | 2.76                 | 10.13                                   | 7000                | Allicin modification improves surface polarity and roughness                               | Energy harvesting devices                                  | 10   |
| A-CNF film, FEP                                                                                          | Conductive adhesive | 155                      | 17.5                                    | 65                   | $0.22 \text{ W m}^{-2}$                 | 10000               | Amino silane modification enhances the positive charge                                     | Wearable electronics                                       | 11   |
| Ethyl cellulose (EC)/PA6 nanofiber, PVDF/MXene                                                           | Cu                  | 46                       | 0.34                                    | -                    | $290 \text{ mW m}^{-2}$                 | 14000               | The introduction of MXene enhances the electronegativity                                   | Self-powered sensor                                        | 12   |
| Chitosan/ $\text{BaTiO}_3$ nanorods, PTFE                                                                | Al                  | 111.4                    | 21.6                                    | -                    | 756                                     | 3000                | The roughness is increased by adding $\text{BaTiO}_3$ filler                               | Large-scale power applications                             | 13   |
| BC/AgNWs/ $\text{BaTiO}_3$ , PDMS                                                                        | Cu                  | 87                       | 7.1                                     | 35                   | 75                                      | 3000                | AgNWs and $\text{BaTiO}_3$ improve dielectric constant and roughness                       | Human-machine interaction device                           | 14   |
| BC/chitosan, PDMS/Cu                                                                                     | Cu                  | 23                       | 0.5                                     | -                    | $3.25 \text{ mW m}^{-2}$                | 1000                | Cu nanoparticles improve electrical conductivity and contact area                          | Self-powered pressure sensors                              | 15   |
| Catechol-chitosan-diatom hydrogel, PDMS                                                                  | Al                  | 110                      | 3.8                                     | -                    | 29.8                                    | -                   | Adding diatoms increases the porosity                                                      | Wearable electronics                                       | 16   |
| Chitosan/activated carbon composite,                                                                     | Cu                  | 48                       | -                                       | -                    | 12.208 mW                               | 2000                | AC to CS can enlarge the porosity,                                                         | Humidity\human motion                                      | 17   |

|                                                                                                                                                 |                  |       |        |    |                            |       |                                                                                                            |                                                 |    |
|-------------------------------------------------------------------------------------------------------------------------------------------------|------------------|-------|--------|----|----------------------------|-------|------------------------------------------------------------------------------------------------------------|-------------------------------------------------|----|
| FEP                                                                                                                                             |                  |       |        |    | $\text{m}^{-2}$            |       | and reduce the resistance                                                                                  | sensor                                          |    |
| Carboxymethyl cellulose sodium (CMC-Na), CMC chitosan (CMCS)                                                                                    | Edible electrode | 3     | 20     | -  | $120 \text{ mW m}^{-2}$    | 3000  | Nanofiber membrane prepared by electrospinning improve electric density                                    | Power electronic equipment                      | 18 |
| CNF aerogel, PDMS                                                                                                                               | Ag               | 55.8  | 0.94   | -  | $29 \text{ mW m}^{-2}$     | 50    | The area of friction layer was enhanced by printing                                                        | Self-powered\ humidity sensor                   | 19 |
| Cellulose nanofibrils, FEP                                                                                                                      | ITO              | 32.8  | 35     | -  | —                          | —     | The design of nanostructures increases the roughness                                                       | Triboelectric flooring\packag                   | 20 |
| Cellulose microfibers (CMFs), cellulose                                                                                                         | Ag               | 21.9  | 0.17   | -  | 7.68                       | —     | Micro and nano structures increase the charge density                                                      | Self-powered healthcare                         | 21 |
| Chitosan-glycerol film, PTFE                                                                                                                    | Al               | 130   | 30     | 60 | —                          | 10000 | The design of nanostructures increases the charge density                                                  | Wearable\self-powered sensors                   | 22 |
| Cellulose/PVA, hydrogel (CPH)                                                                                                                   | Cu               | 41    | 500 mA | 15 | —                          | 4800  | Preparation of hydrogel to enhance the friction layer area                                                 | Wearable electronic devices                     | 23 |
| MXene $\text{Ti}_3\text{C}_2\text{T}_x$ / CMC (MXene/CMC) aerogel                                                                               | Cu               | 54.37 | 1.22   | -  | $402.94 \text{ mW m}^{-2}$ | 1000  | Porously 3D conductive network structure of aerogel increases the charge density                           | Self-powered sensor                             | 24 |
| Ag nanoparticles embedded with Ox-SWCNTs (Ag-Ox-SWCNT), (Ox-SWCNT/PVA/ $\text{H}_3\text{PO}_4$ ) (Ox-SWCNT/PVA/ $\text{H}_3\text{PO}_4$ ), PDMS | Ag               | 90    | 100    | 8  | $84.4 \text{ mW m}^{-2}$   | 10000 | Carboxyl and hydroxyl group functionalized SWCNTs blended with PVA polymers to maintain conductive network | Self-charging power units, wearable Electronics | 25 |
| PWP (polyethylene oxide, water-polyurethane, phytic acid), low-temperature vulcanized (LTV) silicone rubber                                     | Cu               | 197   | 17.3   | 10 | $2 \text{ W m}^{-2}$       | 10000 | Sharp increase and rapid movement of mobile ions in PWP composites increase the output performance         | Tactile sensor, epidermal input touchpad        | 26 |
| VA- $\text{CaCl}_2$ film, silicone rubber                                                                                                       | Al               | 165   | 55 mA  | 50 | $11.3 \text{ W m}^{-2}$    | —     | The addition of ions creates an internal ion polarization that increases the permittivity                  | —                                               | 27 |

|                                                         |                  |       |          |      |                           |        |                                                                                              |                                                  |           |
|---------------------------------------------------------|------------------|-------|----------|------|---------------------------|--------|----------------------------------------------------------------------------------------------|--------------------------------------------------|-----------|
| Polysiloxane-dimethylglyoxime-based polyurethane (PDPU) | AgNW bundle mesh | 3.8   | _        | 2.5  | 35 mW m <sup>-2</sup>     | 10     | The introduction of PDPU promotes charge transport                                           | Self-powered sensing                             | 28        |
| Conductive polyurethane (C-PU) foam, PTFE               | Al               | 102   | 2.2      | -    | 1.5                       | _      | The introduction of C-PU increases the contact area                                          | _                                                | 29        |
| Thermoplastic polyurethane (TPU), PTFE                  | C-AgNW ink layer | 12.5  | 18.4     | 1.45 | _                         | 2000   | Improve contact area through screen-printing process                                         | Wireless wearable device, detection human motion | 30        |
| Silicon rubber (Ecoflex) films, PU foam                 | Cu               | 50    | 0.5      | 15   | _                         | 50000  | Via changing the mesh grid and the foaming conditions                                        | Self-powered sensing                             | 31        |
| PVA/Mxene nanofibers, Silk fibroin nanofibers           | Cu               | 118.4 | _        | -    | 1087.6 mW m <sup>-2</sup> | 124000 | The introduction of nanostructures increases the charge density                              | Monitoring body movement                         | 32        |
| PU, PFE                                                 | Cu               | 105.6 | 20.3     | -    | 0.56 mW m <sup>-2</sup>   | 10000  | Aerogel film increases contact area                                                          | Biomechanical sensor                             | 33        |
| Auxetic PU foam, PTFE, Kraft paper                      | Cu               | 6.98  | 24.53 mA | 80   | _                         | 50000  | Kraft paper is used as a friction layer to enhance roughness                                 | Wearable electronics device                      | 34        |
| CS-Glycerol-Diatomite, FEP                              | Mg               | 205   | 1.65     | 60   | 408 mW m <sup>-2</sup>    | 10000  | Plasticization and the introduction of hydrogen bonds combine to enhance output performance. | Waist-wearable respiration sensor                | This work |

## 1 10. Endogenous TENG

2 The working mechanism of endogenous TENG is mainly in the process of  
 3 releasing pressure, when the pressure is released slowly, the upper friction layer will be  
 4 released preferentially, so the friction macroscopic electric field generated by this  
 5 friction layer can be applied to the structure of the following friction layer, which  
 6 induces more charges, and when the pressure is continued to be released, the  
 7 accumulated charges will be released through the action of the electric field to form an  
 8 electric current, which enhances the output performance.

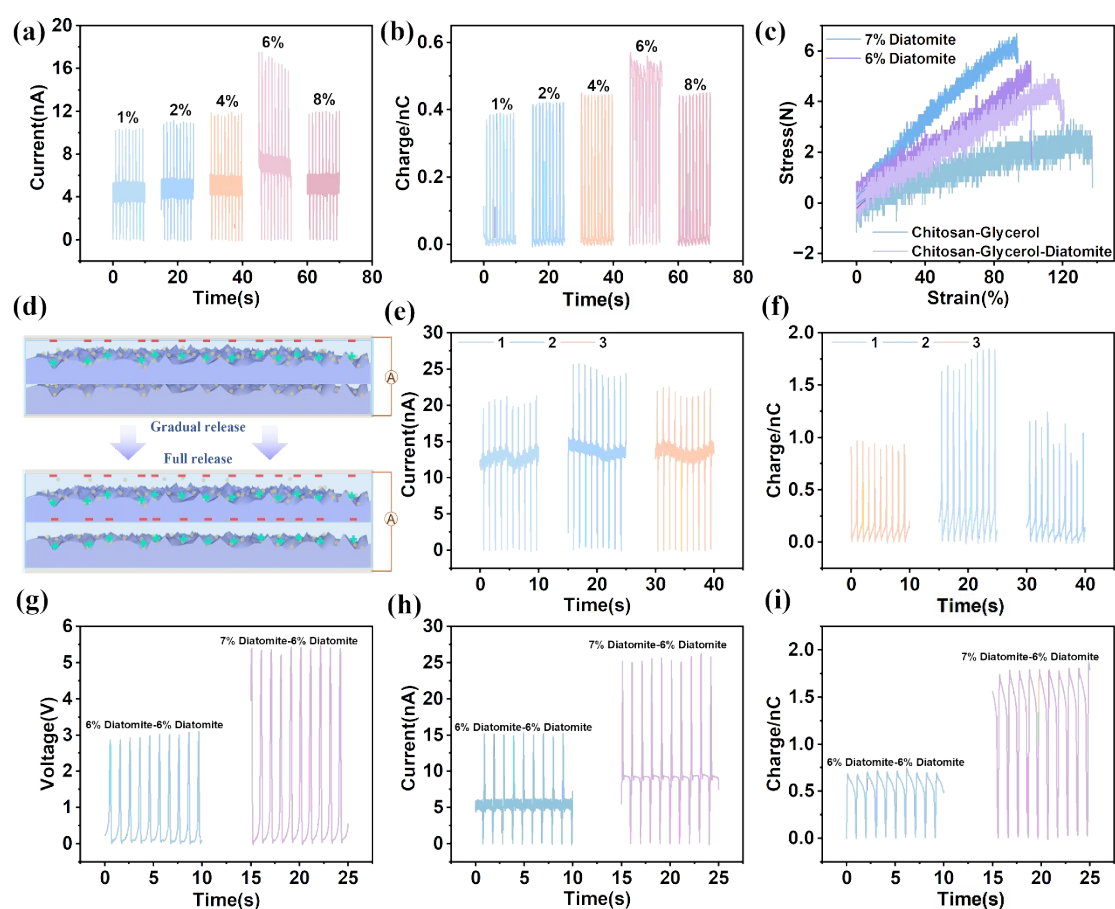

9  
 10 Figure S9 Output performance of endogenous TENG (a) Short circuit current under  
 11 different diatomite contents. (b) Transferred charge under different diatomite contents.  
 12 (c) Stress-strain curves of four composite films. (d) Schematic representation of the  
 13 working mechanism of endogenous TENG from slow to complete release. (I)  
 14 Schematic diagram of the working mechanism when the force is applied. (II) Schematic  
 15 diagram of the working mechanism when the force is released. (e) Comparison of short  
 16 circuit current for different layers of composite film. (f) Comparison of transferred

1 charge for different layers of composite film. (g) Open circuit voltage comparison of  
 2 non-endogenous TENG and endogenous TENG. (h) Open circuit comparison of non-  
 3 endogenous TENG and endogenous TENG. (i) Transferred charge comparison of non-  
 4 endogenous TENG and endogenous TENG.

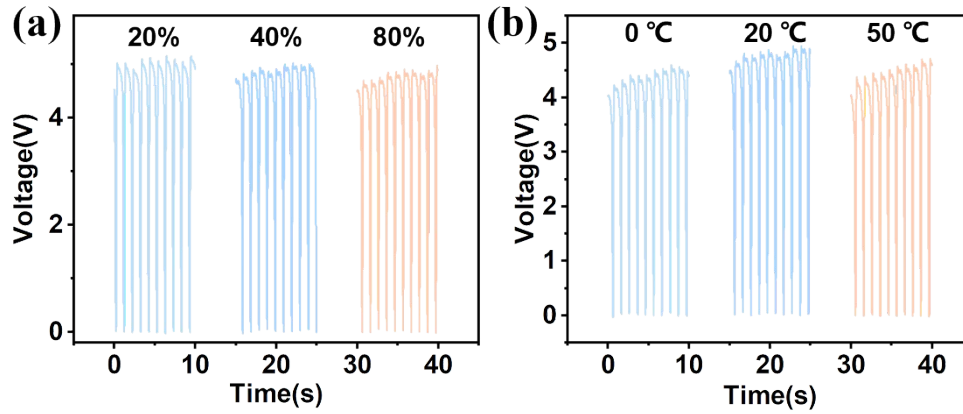

5  
 6 Figure S10 Output performance test of endogenous TENG at different temperatures and  
 7 humidity. (a) Output performance test of endogenous TENG at different humidity. (b)  
 8 Output performance test of endogenous TENG at different temperatures.

9

## 10 11. Information transfer sensors and waist-wearable respiration

### 11 sensor

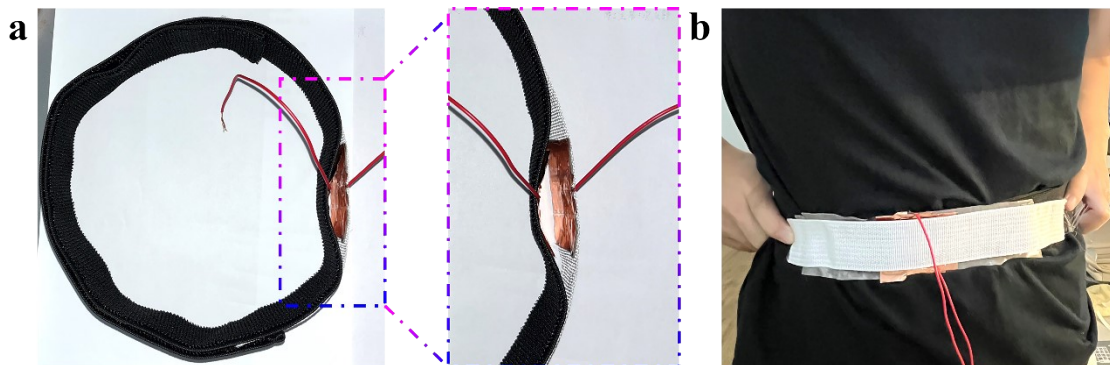

12  
 13 Figure S11 (a) Physical drawing and enlarged drawing of a waist-worn respiratory  
 14 sensor. (b) Physical drawing of a waist-worn respiratory sensor in operation.

15

|          |          |          |          |          |          |          |          |          |          |          |
|----------|----------|----------|----------|----------|----------|----------|----------|----------|----------|----------|
| <b>a</b> | <b>A</b> | <b>B</b> | <b>C</b> | <b>D</b> | <b>E</b> | <b>F</b> | <b>G</b> | <b>H</b> | <b>I</b> | <b>J</b> |
|          | ·-       | -·       | ··-      | -··      | ··-      | ···-     | ··-·     | ··-      | ··-      | ···      |
|          | <b>K</b> | <b>L</b> | <b>M</b> | <b>N</b> | <b>O</b> | <b>P</b> | <b>Q</b> | <b>R</b> | <b>S</b> | <b>T</b> |
|          | -·-      | -··      | ···-     | ··-      | -··-     | -···     | ··-·     | ·-       | ··-      | ··-      |
|          | <b>U</b> | <b>V</b> | <b>W</b> | <b>X</b> | <b>Y</b> | <b>Z</b> |          |          |          |          |
|          | -··      | -··-     | ··       | -··      | --       | ···      |          |          |          |          |

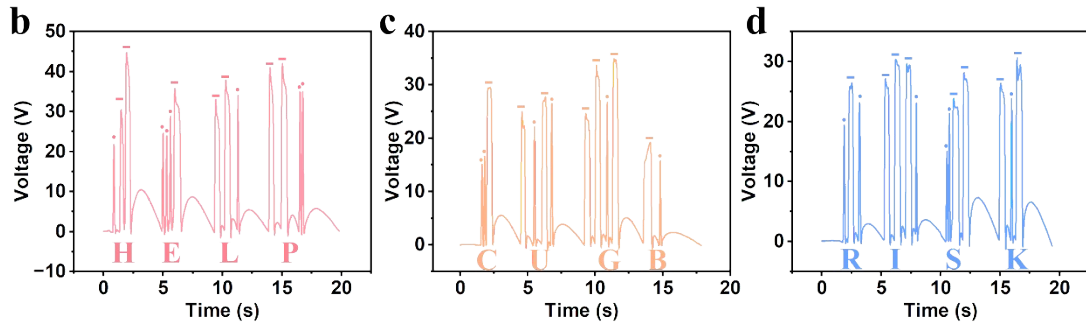

1  
2 Figure S12 (a) The 26 letters Morse code. (b) Spelling "HELP". (c) Spelling of "CUGB".  
3 (d) Spelling "RISK".

#### 4 **12. Machine learning algorithms**

5 We used three algorithms, CNN, SVM and KNN, for classification and compared the  
6 results and found that CNN has the best classification effect. In the training process of  
7 CNN, we divided 158 sets of samples based on all the collected data, and each set of  
8 samples contains 1000 time series points. The dataset includes three categories of fast,  
9 medium, and slow actions, with a number of samples under each category, and is  
10 divided into a training set and a test set in the ratio of 8:2. As shown in Figure S11,  
11 the convolutional layer of this CNN structure uses 64 convolutional kernels, each with  
12 a size of 75 (kernel\_size=75). The activation function of the convolutional layer is  
13 ReLU, and the input shape is (1000, 1), which indicates that each sample consists of a  
14 single-channel sequence of 1000 time points. KNN and SVM process data differently  
15 from CNN. In KNN and SVM, instead of using the original sequence data directly, 14  
16 features, including mean, variance, standard deviation, etc., are manually extracted  
17 from each set of 1000 points of data, and its used as inputs to KNN and SVM models  
18 for classification.

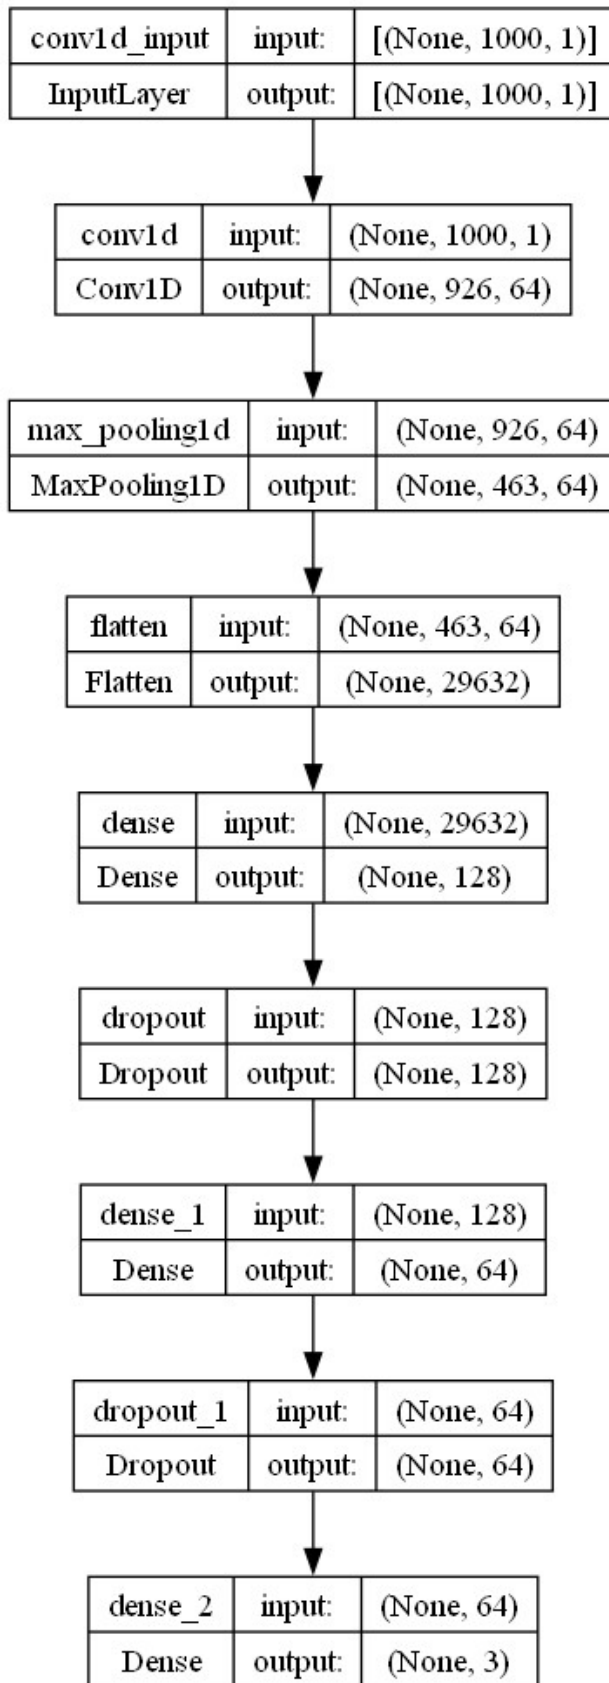

1

2 Figure S13 Diagram of the structure of a CNN

3



## 1 Reference

- 2 1. B. Qian, X. Li, Y. Wang, J. Hou, J. Liu, S. Zou, F. An and W. Lu, *Advanced Materials*, 2024,  
3 DOI: 10.1002/adma.202310926.
- 4 2. Z. Hui, Z. Zhang, Y. Wang, R. Zhang, X. Liu, M. Jiang, F. Ju, W. Hou, Z. Xia, D. Wang, P.  
5 Wang, Y. Pei, R. Yan, Y. Zhang, Q. Chen, W. Huang and G. Sun, *Advanced Materials*, 2024,  
6 DOI: 10.1002/adma.202314163.
- 7 3. C. Ma, J. Su, B. Li, A. Herrmann, H. Zhang and K. Liu, *Advanced Materials*, 2020, DOI:  
8 10.1002/adma.201907697.
- 9 4. C. Luo, Y. Chen, Z. Huang, M. Fu, W. Ou, T. Huang and K. Yue, *Advanced Functional*  
10 *Materials*, 2023, DOI: 10.1002/adfm.202304486.
- 11 5. Y. Li, D. Li, J. Wang, T. Ye, Q. Li, L. Li, R. Gao, Y. Wang, J. Ren, F. Li, J. Lu, E. He, Y. Jiao,  
12 L. Wang and Y. Zhang, *Advanced Functional Materials*, 2023, DOI: 10.1002/adfm.202310260.
- 13 6. S. Sriphan, T. Charoonsuk, T. Maluangnont, P. Pakawanit, C. Rojviriyaya and N. Vittayakorn,  
14 *ADVANCED MATERIALS TECHNOLOGIES*, 2020, **5**.
- 15 7. H.-Y. Mi, X. Jing, Q. Zheng, L. Fang, H.-X. Huang, L.-S. Turng and S. Gong, *NANO ENERGY*,  
16 2018, **48**, 327-336.
- 17 8. W. Shihao, L. Gang, L. Wenxia, Y. Dehai, L. Guodong, L. Xiaona, S. Zhaoping, W. Huili and L.  
18 Hong, *Nano Energy*, 2021, DOI: 10.1016/j.nanoen.2021.106859.
- 19 9. C. Yao, X. Yin, Y. Yu, Z. Cai and X. Wang, *ADVANCED FUNCTIONAL MATERIALS*, 2017,  
20 **27**.
- 21 10. S. Roy, H.-U. Ko, P. K. Maji, L. Van Hai and J. Kim, *Chemical Engineering Journal*, 2019, DOI:  
22 10.1016/j.ccej.2019.123723.
- 23 11. S. Nie, C. Cai, X. Lin, C. Zhang, Y. Lu, J. Mo and S. Wang, *ACS Sustainable Chemistry &*  
24 *Engineering*, 2020, DOI: 10.1021/acssuschemeng.0c07531.
- 25 12. J. Huang, Y. Hao, M. Zhao, W. Li, F. Huang and Q. Wei, *ACS Applied Materials & Interfaces*,  
26 2021, DOI: 10.1021/acsaami.1c03894.
- 27 13. S. Pongampai, T. Charoonsuk, N. Pinpru, P. Pulphol, W. Vittayakorn, P. Pakawanit and N.  
28 Vittayakorn, *COMPOSITES PART B-ENGINEERING*, 2021, **208**.
- 29 14. Y. Hua, S. Yan, L. Chen, L. Yan, M. Hong-zhi, Z. Yu-hao, Y. Bo, S. Jia-bin and Y. Ming-bo,  
30 *Composites Part A: Applied Science and Manufacturing*, 2021, DOI:  
31 10.1016/j.compositesa.2021.106646.
- 32 15. J. Huang, Y. Hao, M. Zhao, H. Qiao, F. Huang, D. Li and Q. Wei, *COMPOSITES PART A-*  
33 *APPLIED SCIENCE AND MANUFACTURING*, 2021, **146**.
- 34 16. J.-N. Kim, J. Lee, H. Lee and I.-K. Oh, *NANO ENERGY*, 2021, **82**.
- 35 17. Z. Xu, D. Zhang, X. Liu, Y. Yang, X. Wang and Q. Xue, *NANO ENERGY*, 2022, **94**.
- 36 18. K. Yan, X. Li, X.-X. Wang, M. Yu, Z. Fan, S. Ramakrishna, H. Hu and Y.-Z. Long, *Journal of*  
37 *Materials Chemistry A*, 2020, DOI: 10.1039/d0ta08909e.
- 38 19. C. Qian, L. Li, M. Gao, H. Yang, Z. Cai, B. Chen, Z. Xiang, Z. Zhang and Y. Song, *Nano Energy*,  
39 2019, DOI: 10.1016/j.nanoen.2019.103885.
- 40 20. C. Yao, A. Hernandez, Y. Yu, Z. Cai and X. Wang, *NANO ENERGY*, 2016, **30**, 103-108.
- 41 21. X. He, H. Zou, Z. Geng, X. Wang, W. Ding, F. Hu, Y. Zi, C. Xu, S. L. Zhang, H. Yu, M. Xu, W.  
42 Zhang, C. Lu and Z. L. Wang, *Advanced Functional Materials*, 2018, DOI:  
43 10.1002/adfm.201805540.
- 44 22. Y.-T. Jao, P.-K. Yang, C.-M. Chiu, Y.-J. Lin, S.-W. Chen, D. Choi and Z.-H. Lin, *NANO*

- 1            *ENERGY*, 2018, **50**, 513-520.
- 2 23.        Y. Wang, L. Zhang and A. Lu, *Journal of Materials Chemistry A*, 2020, DOI:  
3            10.1039/d0ta02010a.
- 4 24.        Y. Cheng, W. Zhu, X. Lu and C. Wang, *Nano Energy*, 2022, DOI:  
5            10.1016/j.nanoen.2022.107229.
- 6 25.        H. J. Yang, J.-W. Lee, S. H. Seo, B. Jeong, B. Lee, W. J. Do, J. H. Kim, J. Y. Cho, A. Jo, H. J.  
7            Jeong, S. Y. Jeong, G.-H. Kim, G.-W. Lee, Y.-E. Shin, H. Ko, J. T. Han and J. H. Park, *Nano*  
8            *Energy*, 2021, DOI: 10.1016/j.nanoen.2021.106083.
- 9 26.        Z. Bai, Y. Xu, C. Lee and J. Guo, *Advanced Functional Materials*, 2021, DOI:  
10           10.1002/adfm.202104365.
- 11 27.        C. Jian Ye, K. Jason Soon Chye, C. Ruihao, A. Kean Chin, V. Thamil Selvi, C. Binghui, L. Jing,  
12            F. Chuan Yi and G. Wee Chen, *Nano Energy*, 2021, DOI: 10.1016/j.nanoen.2021.106616.
- 13 28.        J. Xiong, G. Thangavel, J. Wang, X. Zhou and P. S. Lee, *Science Advances*, 2020, DOI:  
14            10.1126/sciadv.abb4246.
- 15 29.        H. Zhang, Y. Lu, A. Ghaffarinejad and P. Basset, *Nano Energy*, 2018, DOI:  
16            10.1016/j.nanoen.2018.06.038.
- 17 30.        G. Zhu, P. Ren, J. Yang, J. Hu, Z. Dai, H. Chen, Y. Li and Z. Li, *Nano Energy*, 2022, DOI:  
18            10.1016/j.nanoen.2022.107327.
- 19 31.        X. Yibing, H. Jiashun, L. Heng, M. Hao-Yang, N. Gaolei, Z. Xiaoshuai, J. Xin, W. Yameng, Z.  
20            Guoqiang, L. Chuntai and S. Changyu, *Nano Energy*, 2021, DOI:  
21            10.1016/j.nanoen.2021.106827.
- 22 32.        C. Jiang, C. Wu, X. Li, Y. Yao, L. Lan, F. Zhao, Z. Ye, Y. Ying and J. Ping, *Nano Energy*, 2019,  
23            DOI: 10.1016/j.nanoen.2019.02.052.
- 24 33.        Z. Saadatnia, S. G. Mosanenzadeh, T. Li, E. Esmailzadeh and H. E. Naguib, *Nano Energy*, 2019,  
25            DOI: 10.1016/j.nanoen.2019.104019.
- 26 34.        Y. Feng, X. Huang, S. Liu, W. Guo, Y. Li and H. Wu, *Nano Energy*, 2019, DOI:  
27            10.1016/j.nanoen.2019.05.043.
- 28
